# Supplementary material for: Comparing float pCO 2 profiles in the Southern Ocean to ship data reveals discrepancies
Source: Copernicus journal article supplement (doi:10.5194/egusphere-2023-3143), 2024-01-09
Supplement: Supplementary file 1 [file egusphere-2023-3143-supplement.pdf]

# Supplement of Comparing float $p\text{CO}_2$ profiles in the Southern Ocean to ship data reveals discrepancies

Chuqing Zhang<sup>1</sup>, Yingxu Wu<sup>2</sup>, Peter J. Brown<sup>3</sup>, David Stappard<sup>1</sup>, Amavi N. Silva<sup>1</sup>, and Toby Tyrrell<sup>1</sup>

<sup>1</sup>University of Southampton, National Oceanography Centre Southampton, Southampton, UK

5 <sup>2</sup>Polar and Marine Research Institute, Jimei University, Xiamen, China

<sup>3</sup>National Oceanography Centre, Southampton, UK

## Contents of this file

10

Figures S1 to S10

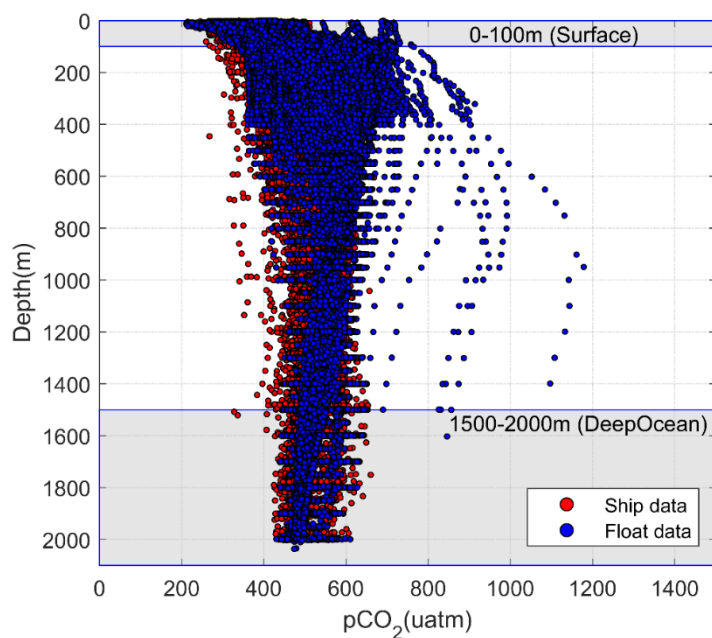

15 **Figure S1.** Scatterplot of  $p\text{CO}_2$  at different depths in the Southern Ocean. Ship data (red) is plotted first and float data (blue) second.

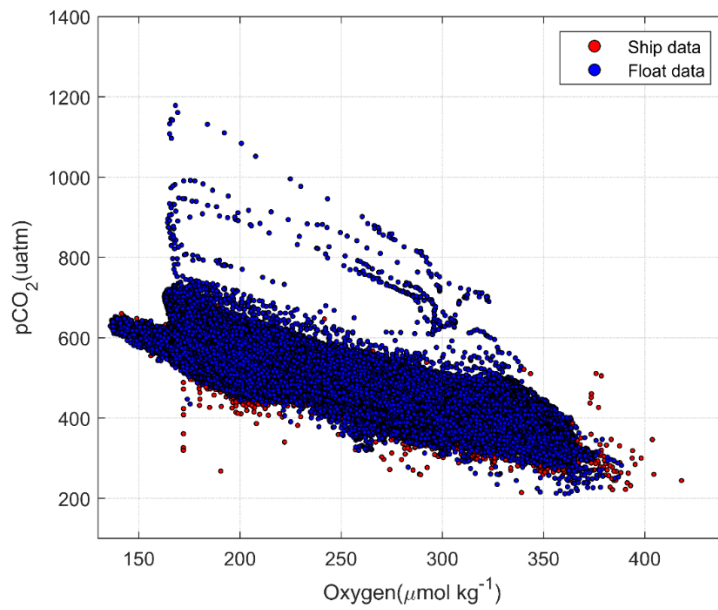

**Figure S2.** Scatterplot of  $p\text{CO}_2$  against oxygen (ship data and float data) in the SO region. (Ship data (red) is plotted first and float data (blue) second).

20

25

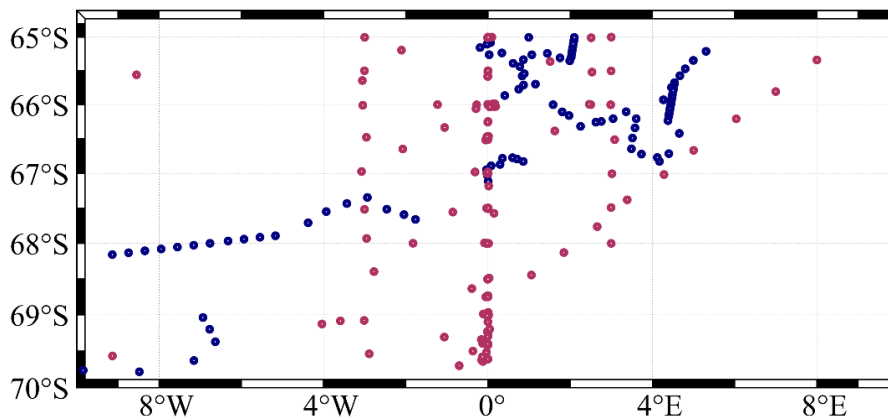

**Figure S3.** Location of ship data (red) and float data (blue) in the region around the prime meridian, near Antarctica (70°S-65°S, 10°W-10°E)

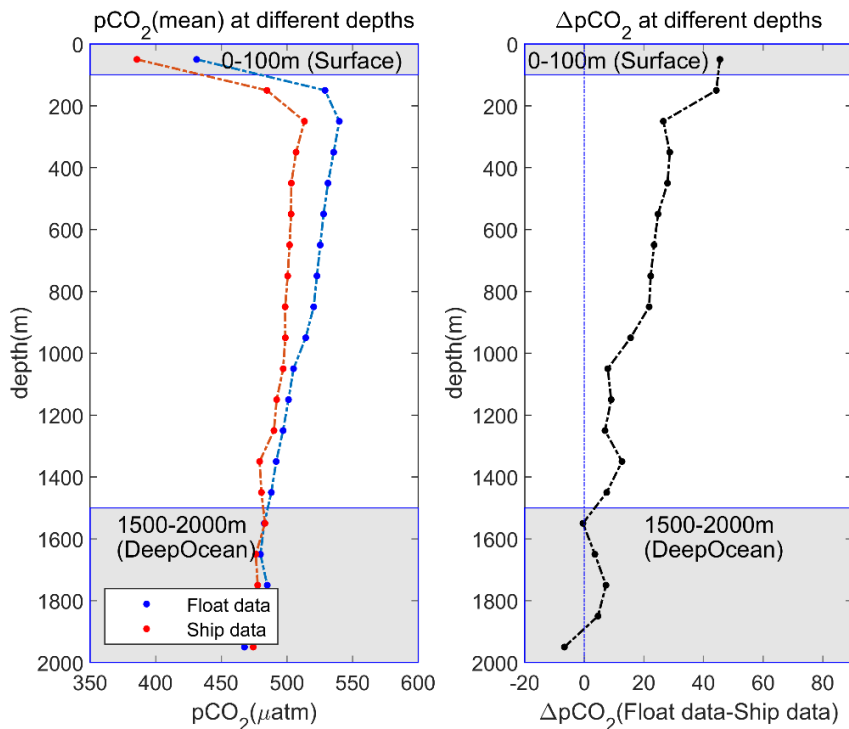

30 **Figure S4.** pCO<sub>2</sub> (mean) at different depths (left), and difference between float pCO<sub>2</sub> minus ship pCO<sub>2</sub> at different depths (right) in the region around the prime meridian, near Antarctica (70°S-65°S, 10°W-10°E).

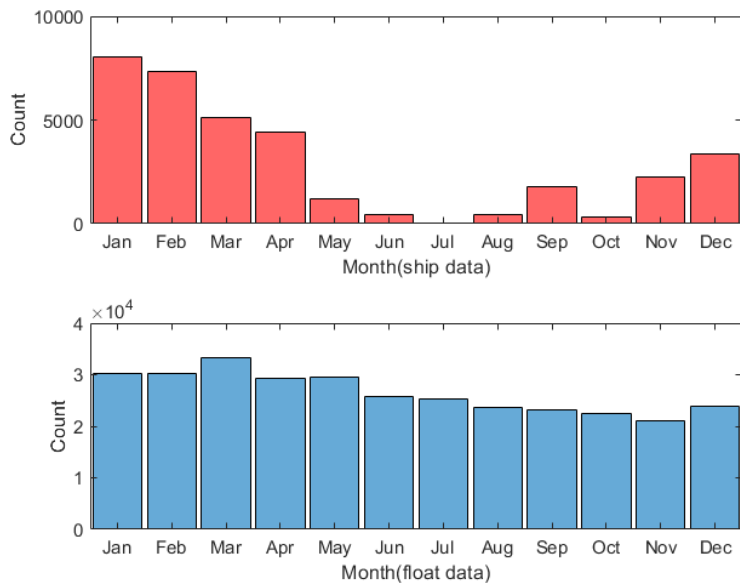

**Figure S5.** Distribution of ship data (red) and float data (blue) across different months in Southern Ocean. Severe weather conditions create difficulties for data collection by ship during southern hemisphere winter.

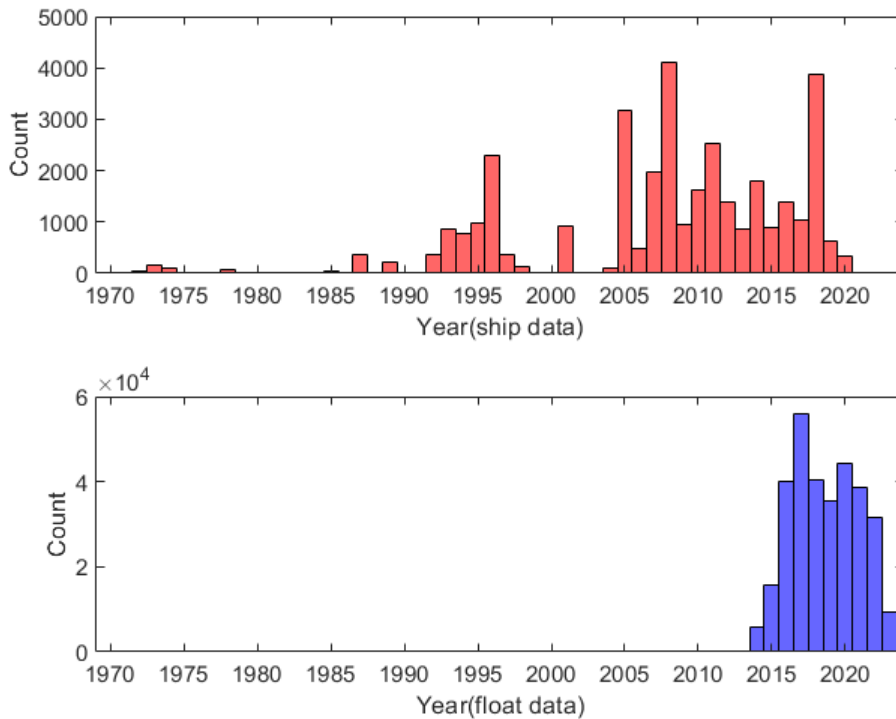

**Figure S6.** Distribution of ship data (red) and float data (blue) across different years in Southern Ocean. The recently collected float data implies a greater influence of anthropogenic carbon trends.

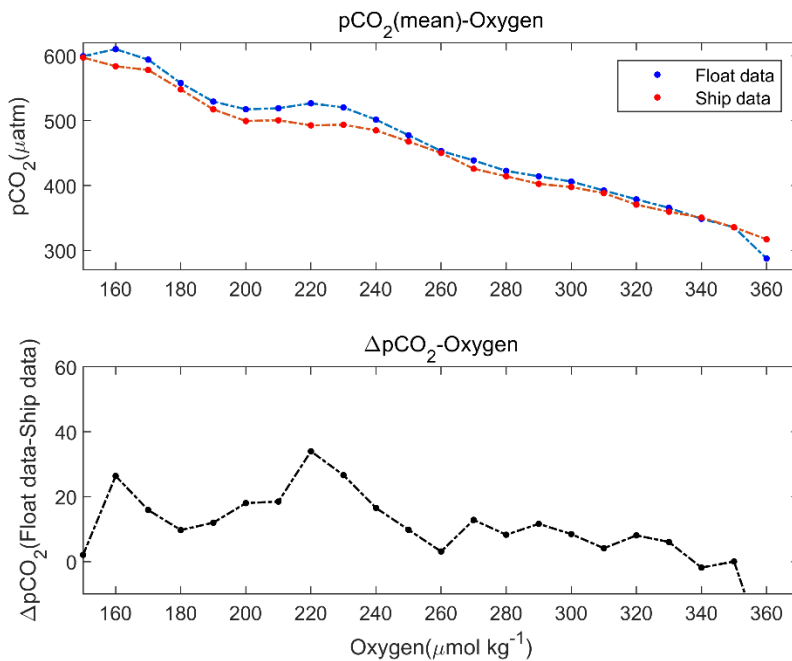

40 **Figure S7.** Adjusted  $p\text{CO}_2$  (mean) (incorporating factors 2, 3 & 5 in Table 1) against oxygen of float and ship data (above); the difference ( $\Delta p\text{CO}_2$ , below) is calculated as float  $p\text{CO}_2$  minus ship  $p\text{CO}_2$ .

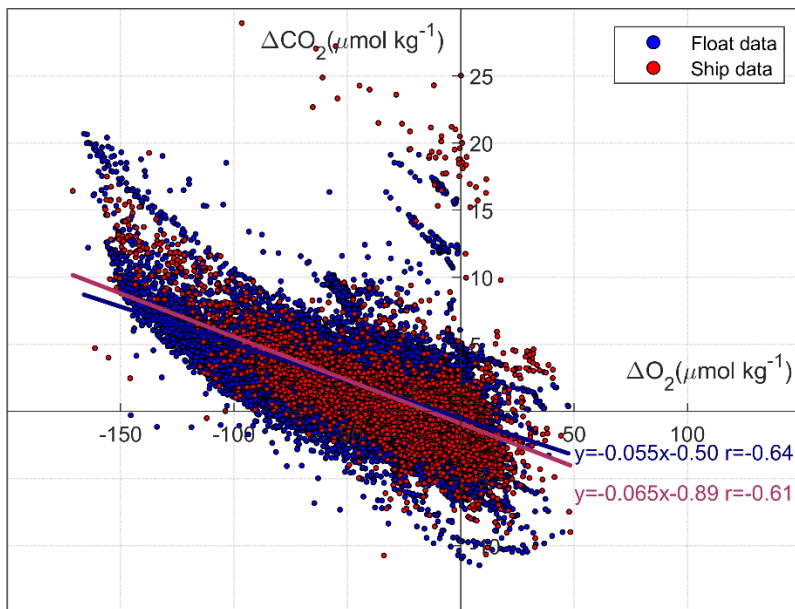

45 **Figure S8.** Adjusted CORS plots based on float data (blue) and ship data (red), the blue line is the best-fit lines of float data and the pink line is the best-fit lines of ship data,  $r$  is the associated Pearson correlation coefficient.

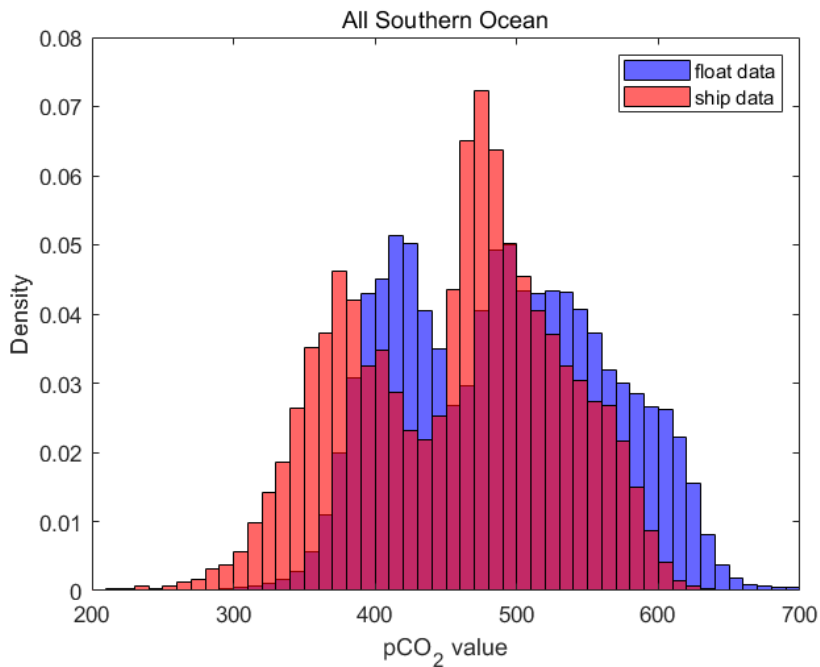

**Figure S9.** Frequency distributions of adjusted float  $p\text{CO}_2$  and ship  $p\text{CO}_2$  (all depths between surface and 2000 m)

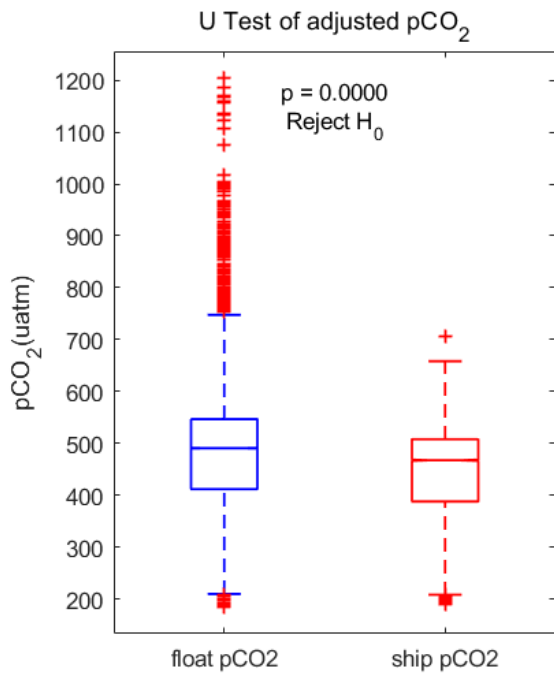

50 **Figure S10.** Boxplots and Mann Whitney U Test results for adjusted  $p\text{CO}_2$ , comparing adjusted ship and float  $p\text{CO}_2$  data in all the Southern Ocean. The null hypothesis for the Mann-Whitney U Test is that both populations are identically distributed (equal medians).
